# Supplementary material for: Large-Scale Profiling of Extracellular Vesicles Identified miR-625-5p as a Novel Biomarker of Immunotherapy Response in Advanced Non-Small-Cell Lung Cancer Patients
Source: MDPI journal article supplement (doi:10.3390/cancers14102435), 2022-05-14
Supplement: s1 [file s1]

| Dependent : Objective Response |                      | Not<br>Responder | Responder  | OR (univariable)             |
|--------------------------------|----------------------|------------------|------------|------------------------------|
| <b>Setting</b>                 | First Line           | 19 (51.4%)       | 18 (48.6%) | -                            |
|                                | Second or Third Line | 45 (88.2%)       | 6 (11.8%)  | 0.14 (0.04-0.39, p= < 0.001) |
| <b>Treatment</b>               | Pembrolizumab        | 30 (56.6%)       | 23 (43.4%) | -                            |
|                                | Nivolumab            | 34 (97.1%)       | 1 (2.9%)   | 0.04 (0.00-0.20, p= 0.002)   |
| <b>PDL1 Staining</b>           | ≥50%                 | 23 (52.3%)       | 21 (47.7%) | -                            |
|                                | <50%                 | 41 (93.2%)       | 3 (6.8%)   | 0.08 (0.02-0.26, p < 0.001)  |
| <b>hsa.miR.625.5p</b>          | Low                  | 14 (42.4%)       | 19 (57.6%) | -                            |
|                                | High                 | 50 (90.9%)       | 5 (9.1%)   | 0.07 (0.02-0.22, p < 0.001)  |
