# Supplementary material for: Large-Scale Profiling of Extracellular Vesicles Identified miR-625-5p as a Novel Biomarker of Immunotherapy Response in Advanced Non-Small-Cell Lung Cancer Patients
Source: MDPI journal article supplement (doi:10.3390/cancers14102435), 2022-05-14
Supplement: s1 [file s1]

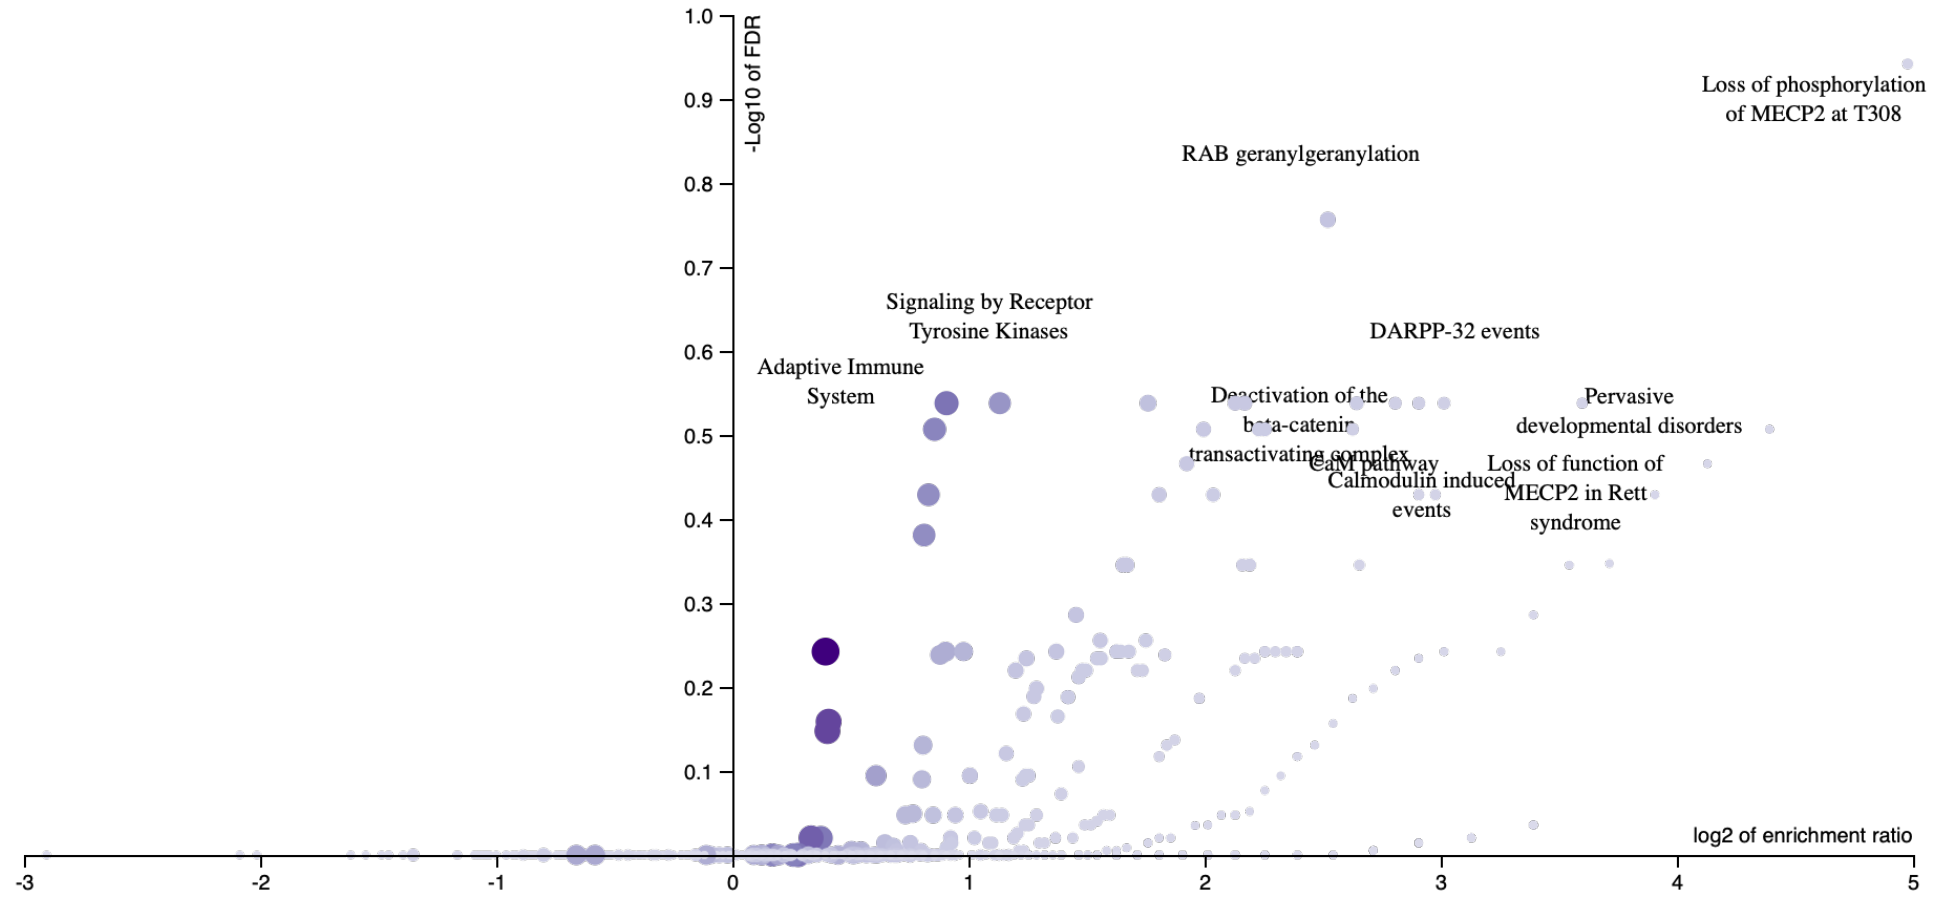

| geneSet       | description                                              | link                                                                                                                | size | overlap | expect     | enrichmentRatio | pValue     | userid                                                                                                                                                              |
|---------------|----------------------------------------------------------|---------------------------------------------------------------------------------------------------------------------|------|---------|------------|-----------------|------------|---------------------------------------------------------------------------------------------------------------------------------------------------------------------|
| R-HSA-9022535 | Loss of phosphorylation of MECP2 at T308                 | <a href="http://reactome.org/PathwayBrowser/#/R-HSA-9022535">http://reactome.org/PathwayBrowser/#/R-HSA-9022535</a> | 5    | 3       | 0.09522456 | 31.50447761     | 6.62E-05   | PRKACA;CALM1;CAMK4                                                                                                                                                  |
| R-HSA-8873719 | RAB geranylgeranylation                                  | <a href="http://reactome.org/PathwayBrowser/#/R-HSA-8873719">http://reactome.org/PathwayBrowser/#/R-HSA-8873719</a> | 64   | 7       | 1.21887436 | 5.743003731     | 2.03E-04   | RAB12;RAB33B;RABGGTB;RAB5B;RAB14;RAB3B;RAB7A                                                                                                                        |
| R-HSA-9006934 | Signaling by Receptor Tyrosine Kinases                   | <a href="http://reactome.org/PathwayBrowser/#/R-HSA-9006934">http://reactome.org/PathwayBrowser/#/R-HSA-9006934</a> | 455  | 19      | 8.66543491 | 2.192619321     | 0.001085   | PPP2R1A;PAG1;PTPRS;ACTB;PRKACA;ABI2;CALM1;WASF1;AKT2;JGF1;COL1A1;ESR1;DOCK3;ELK1;RBFOX2;FLRT1;JGF1R;COL4A3;LYN                                                      |
| R-HSA-1280218 | Adaptive Immune System                                   | <a href="http://reactome.org/PathwayBrowser/#/R-HSA-1280218">http://reactome.org/PathwayBrowser/#/R-HSA-1280218</a> | 756  | 14      | 13.9979534 | 1.875266525     | 0.00111664 | UBE2N;PPP2R1A;PAG1;UBE2K;PRKACA;TUBAL3;CALM1;AKT2;KLHL13;CTSB;ZNRF2;NFkB1;COL1A1;DAPP1;UBE2R2;SEC24A;SIAH1;UBE2D2;MRCl;CHUK;PIANP;AP1G1;UFL1;FBX19;TRIM41;LYN;RAB7A |
| R-HSA-3769402 | Deactivation of the beta-catenin transactivating complex | <a href="http://reactome.org/PathwayBrowser/#/R-HSA-3769402">http://reactome.org/PathwayBrowser/#/R-HSA-3769402</a> | 42   | 5       | 0.7998863  | 6.250888415     | 0.0011437  | AXIN2;SOX7;BCCL9;TCF7L2;SOX6                                                                                                                                        |
| R-HSA-180024  | DARPP-32 events                                          | <a href="http://reactome.org/PathwayBrowser/#/R-HSA-180024">http://reactome.org/PathwayBrowser/#/R-HSA-180024</a>   | 26   | 4       | 0.49516771 | 8.078071183     | 0.00137412 | PPP2R1A;PRKACA;CALM1;PDE4A                                                                                                                                          |
| R-HSA-9005891 | Loss of function of MECP2 in Rett syndrome               | <a href="http://reactome.org/PathwayBrowser/#/R-HSA-9005891">http://reactome.org/PathwayBrowser/#/R-HSA-9005891</a> | 13   | 3       | 0.24758385 | 12.11710677     | 0.00169046 | PRKACA;CALM1;CAMK4                                                                                                                                                  |
| R-HSA-9005895 | Pervasive developmental disorders                        | <a href="http://reactome.org/PathwayBrowser/#/R-HSA-9005895">http://reactome.org/PathwayBrowser/#/R-HSA-9005895</a> | 13   | 3       | 0.24758385 | 12.11710677     | 0.00169046 | PRKACA;CALM1;CAMK4                                                                                                                                                  |
| R-HSA-111933  | Calmodulin induced events                                | <a href="http://reactome.org/PathwayBrowser/#/R-HSA-111933">http://reactome.org/PathwayBrowser/#/R-HSA-111933</a>   | 28   | 4       | 0.53325753 | 7.501066098     | 0.00182686 | PRKACA;CALM1;CAMK4;PDE1B                                                                                                                                            |
| R-HSA-111997  | CAM pathway                                              | <a href="http://reactome.org/PathwayBrowser/#/R-HSA-111997">http://reactome.org/PathwayBrowser/#/R-HSA-111997</a>   | 28   | 4       | 0.53325753 | 7.501066098     | 0.00182686 | PRKACA;CALM1;CAMK4;PDE1B                                                                                                                                            |
