# Supplementary material for: Large-Scale Profiling of Extracellular Vesicles Identified miR-625-5p as a Novel Biomarker of Immunotherapy Response in Advanced Non-Small-Cell Lung Cancer Patients
Source: MDPI journal article supplement (doi:10.3390/cancers14102435), 2022-05-14
Supplement: s1 [file s1]

| Clinical Information      | HR     | Lower 95% | Upper 95% | Original P value |
|---------------------------|--------|-----------|-----------|------------------|
| Adrenal Met               | 0.9577 | 0.4955    | 1.8509    | 0.8977           |
| Age >70 yy                | 0.8043 | 0.4936    | 1.3105    | 0.3819           |
| Bone Met                  | 0.8698 | 0.4788    | 1.5802    | 0.6471           |
| Brain Met                 | 1.9885 | 0.8491    | 4.6571    | 0.1134           |
| Current Smoker            | 0.9147 | 0.5243    | 1.5957    | 0.7535           |
| EGFRmut                   | 1.8161 | 0.6522    | 5.0573    | 0.2535           |
| Histology Adenocarcinoma  | 0.6930 | 0.4115    | 1.1668    | 0.1677           |
| Lung Met                  | 0.8698 | 0.4788    | 1.5802    | 0.6471           |
| Node Met                  | 0.9232 | 0.5094    | 1.6732    | 0.7923           |
| Other Site Met            | 1.2385 | 0.5849    | 2.6226    | 0.5763           |
| Pleural Effusion          | 1.0631 | 0.6514    | 1.7352    | 0.8065           |
| Sex Male                  | 1.1197 | 0.6480    | 1.9349    | 0.6854           |
| SoftTissue Met            | 0.7858 | 0.2835    | 2.1780    | 0.6431           |
| Surgery on Primary Cancer | 0.9553 | 0.6326    | 1.4427    | 0.8279           |
