# Supplementary material for: Large-Scale Profiling of Extracellular Vesicles Identified miR-625-5p as a Novel Biomarker of Immunotherapy Response in Advanced Non-Small-Cell Lung Cancer Patients
Source: MDPI journal article supplement (doi:10.3390/cancers14102435), 2022-05-14
Supplement: s1 [file s1]

A

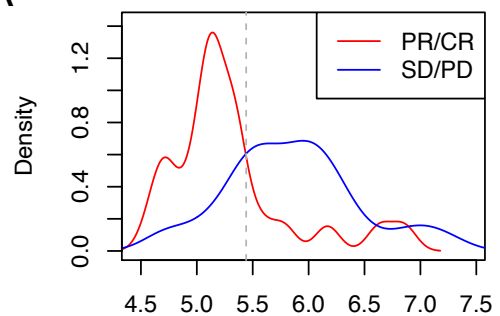

hsa-miR-625-5p Normalized Counts

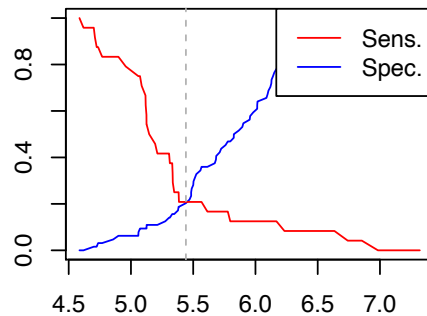

hsa-miR-625-5p Normalized Counts

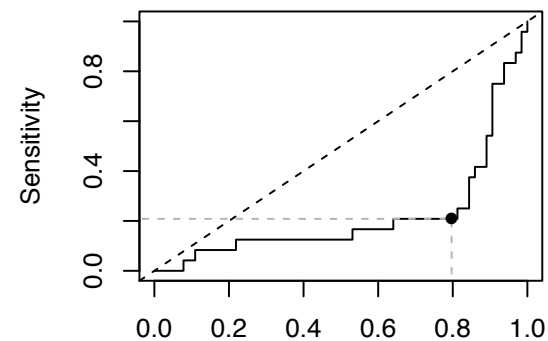

1-Specificity

B

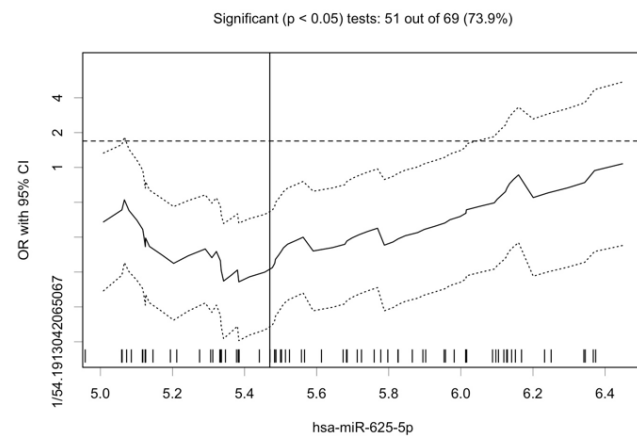

hsa-miR-625-5p

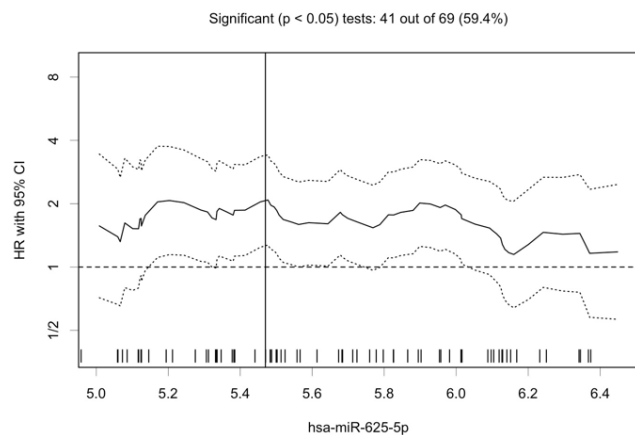

hsa-miR-625-5p

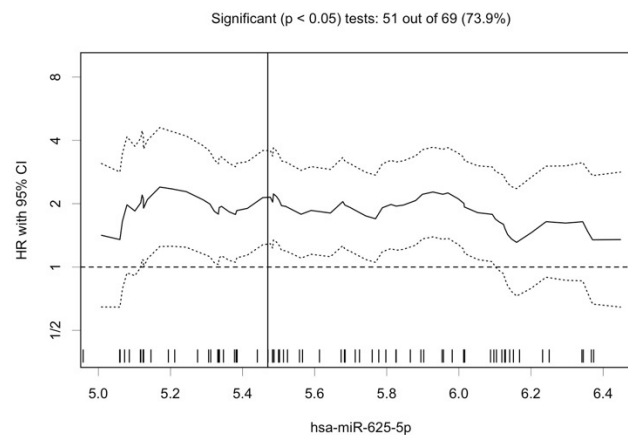

hsa-miR-625-5p
