# Supplementary material for: Large-Scale Profiling of Extracellular Vesicles Identified miR-625-5p as a Novel Biomarker of Immunotherapy Response in Advanced Non-Small-Cell Lung Cancer Patients
Source: MDPI journal article supplement (doi:10.3390/cancers14102435), 2022-05-14
Supplement: s1 [file s1]

| Clinical Information    | p value    | Spearman r   | Confidence intervals of rs |
|-------------------------|------------|--------------|----------------------------|
| Adrenal Metastasis      | 0.97433246 | -0.003479614 | -0.2188 to 0.2121          |
| Age                     | 0.71007269 | 0.04018819   | -0.1768 to 0.2534          |
| Bone Metastasis         | 0.54031029 | 0.066150351  | -0.1515 to 0.2776          |
| Brain Metastasis        | 0.14378505 | 0.157109517  | -0.06038 to 0.3604         |
| Hystology               | 0.67627126 | -0.045134342 | -0.2581 to 0.1720          |
| Liver Metastasis        | 0.04688526 | 0.212463157  | -0.003123 to 0.4092        |
| Lung Metastasis         | 0.38984522 | 0.092794242  | -0.1252 to 0.3022          |
| Node Metastasis         | 0.55604102 | 0.063604891  | -0.1539 to 0.2753          |
| Other Metastasis        | 0.87575026 | 0.01690847   | -0.1993 to 0.2315          |
| PDL1Staining            | 0.00827086 | -0.279863462 | -0.4671 to -0.06855        |
| Pleural Effusion        | 0.28186678 | 0.115987117  | -0.1020 to 0.3234          |
| SoftTissue Metastasis   | 0.80551843 | 0.026622247  | -0.1899 to 0.2407          |
| Therapy Line            | 0.09359564 | 0.179850726  | -0.03703 to 0.3805         |
| TumorTargetsizeBaseline | 0.750219   | 0.039319731  | -0.2079 to 0.2818          |
