# Supplementary material for: Large-Scale Profiling of Extracellular Vesicles Identified miR-625-5p as a Novel Biomarker of Immunotherapy Response in Advanced Non-Small-Cell Lung Cancer Patients
Source: MDPI journal article supplement (doi:10.3390/cancers14102435), 2022-05-14
Supplement: s1 [file s1]

| Dependent : Progression Free Survival |                      | All        | HR (univariable)            |
|---------------------------------------|----------------------|------------|-----------------------------|
| <b>Setting</b>                        | First Line           | 37 (42.0%) | -                           |
|                                       | Second or Third Line | 51 (58.0%) | 1.80 (1.11-2.91, p= 0.016)  |
| <b>Treatment</b>                      | Pembrolizumab        | 53 (60.2%) | -                           |
|                                       | Nivolumab            | 35 (39.8%) | 1.68 (1.05-2.69, p= 0.031)  |
| <b>Tumor Burden</b>                   | ≥ 115 mm             | 46 (52.3%) | -                           |
|                                       | < 115 mm             | 42 (47.7%) | 0.49 (0.31-0.78, p= 0.003)  |
| <b>Liver Metastases</b>               | Yes                  | 71 (80.7%) | -                           |
|                                       | No                   | 17 (19.3%) | 2.45 (1.38-4.37, p= 0.002)  |
| <b>PDL1 Staning</b>                   | ≥50%                 | 44 (50.0%) | -                           |
|                                       | <50%                 | 44 (50.0%) | 3.29 (1.96-5.50, p < 0.001) |
| <b>hsa.miR.625.5p</b>                 | Low                  | 33 (37.5%) | -                           |
|                                       | High                 | 55 (62.5%) | 2.04 (1.24-3.35, p= 0.005)  |
