# Supplementary material for: Large-Scale Profiling of Extracellular Vesicles Identified miR-625-5p as a Novel Biomarker of Immunotherapy Response in Advanced Non-Small-Cell Lung Cancer Patients
Source: MDPI journal article supplement (doi:10.3390/cancers14102435), 2022-05-14
Supplement: s1 [file s1]

| Clinical Information      | OR    | Lower 95% | Upper 95% | Original P value |
|---------------------------|-------|-----------|-----------|------------------|
| Age >70 yy                | 0.836 | 0.323     | 2.165     | 0.712            |
| Bone Met                  | 0.616 | 0.223     | 1.701     | 0.35             |
| Brain Met                 | 0.459 | 0.120     | 1.751     | 0.255            |
| Current Smoker            | 0.347 | 0.072     | 1.661     | 0.185            |
| Current Smoker            | 2.143 | 0.775     | 5.924     | 0.142            |
| ECOG 0-1                  | 0.694 | 0.267     | 1.801     | 0.452            |
| EGFRmut                   | 1.106 | 0.582     | 2.099     | 0.759            |
| Histology Adenocarcinoma  | 1.600 | 0.521     | 4.914     | 0.412            |
| Liver Met                 | 0.702 | 0.207     | 2.384     | 0.57             |
| Lung Met                  | 0.945 | 0.365     | 2.449     | 0.908            |
| Node Met                  | 0.988 | 0.312     | 3.133     | 0.984            |
| Other Site Met            | 0.250 | 0.030     | 2.071     | 0.199            |
| Pleural Effusion          | 0.347 | 0.072     | 1.661     | 0.185            |
| Sex Male                  | 0.774 | 0.282     | 2.128     | 0.62             |
| SoftTissue Met            | 0.545 | 0.060     | 4.932     | 0.59             |
| Surgery on Primary Cancer | 1.106 | 0.582     | 2.099     | 0.759            |
| TumorBurden               | 0.702 | 0.207     | 2.384     | 0.57             |
