# Supplementary material for: Large-Scale Profiling of Extracellular Vesicles Identified miR-625-5p as a Novel Biomarker of Immunotherapy Response in Advanced Non-Small-Cell Lung Cancer Patients
Source: MDPI journal article supplement (doi:10.3390/cancers14102435), 2022-05-14
Supplement: s1 [file s1]

| Dependent : Overall Survival |                      | All        | HR (univariable)            |
|------------------------------|----------------------|------------|-----------------------------|
| <b>Setting</b>               | First Line           | 37 (42.0%) | -                           |
|                              | Second or Third Line | 51 (58.0%) | 1.75 (1.07-2.85, p= 0.025)  |
| <b>Treatment</b>             | Pembrolizumab        | 53 (60.2%) | -                           |
|                              | Nivolumab            | 35 (39.8%) | 1.97 (1.22-3.16, p= 0.005)  |
| <b>ECOG</b>                  | 0                    | 40 (45.5%) | -                           |
|                              | 1                    | 48 (54.5%) | 1.65 (1.01-2.69, p= 0.044)  |
| <b>Tumor Burden</b>          | ≥ 115 mm             | 46 (52.3%) | -                           |
|                              | < 115 mm             | 42 (47.7%) | 0.51 (0.31-0.82, p= 0.005)  |
| <b>Liver Metastases</b>      | Yes                  | 71 (80.7%) | -                           |
|                              | No                   | 17 (19.3%) | 2.69 (1.50-4.80, p= 0.001)  |
| <b>PDL1 Staining</b>         | ≥50%                 | 44 (50.0%) | -                           |
|                              | <50%                 | 44 (50.0%) | 2.87 (1.75-4.72, p < 0.001) |
| <b>hsa.miR.625.5p</b>        | Low                  | 33 (37.5%) | -                           |
|                              | High                 | 55 (62.5%) | 2.14 (1.28-3.58, p= 0.004)  |
