# Supplementary figures and images for: Large-Scale Profiling of Extracellular Vesicles Identified miR-625-5p as a Novel Biomarker of Immunotherapy Response in Advanced Non-Small-Cell Lung Cancer Patients
Source: MDPI journal article supplement (doi:10.3390/cancers14102435), 2022-05-14

**A**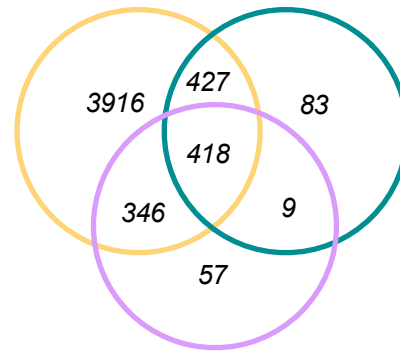**B**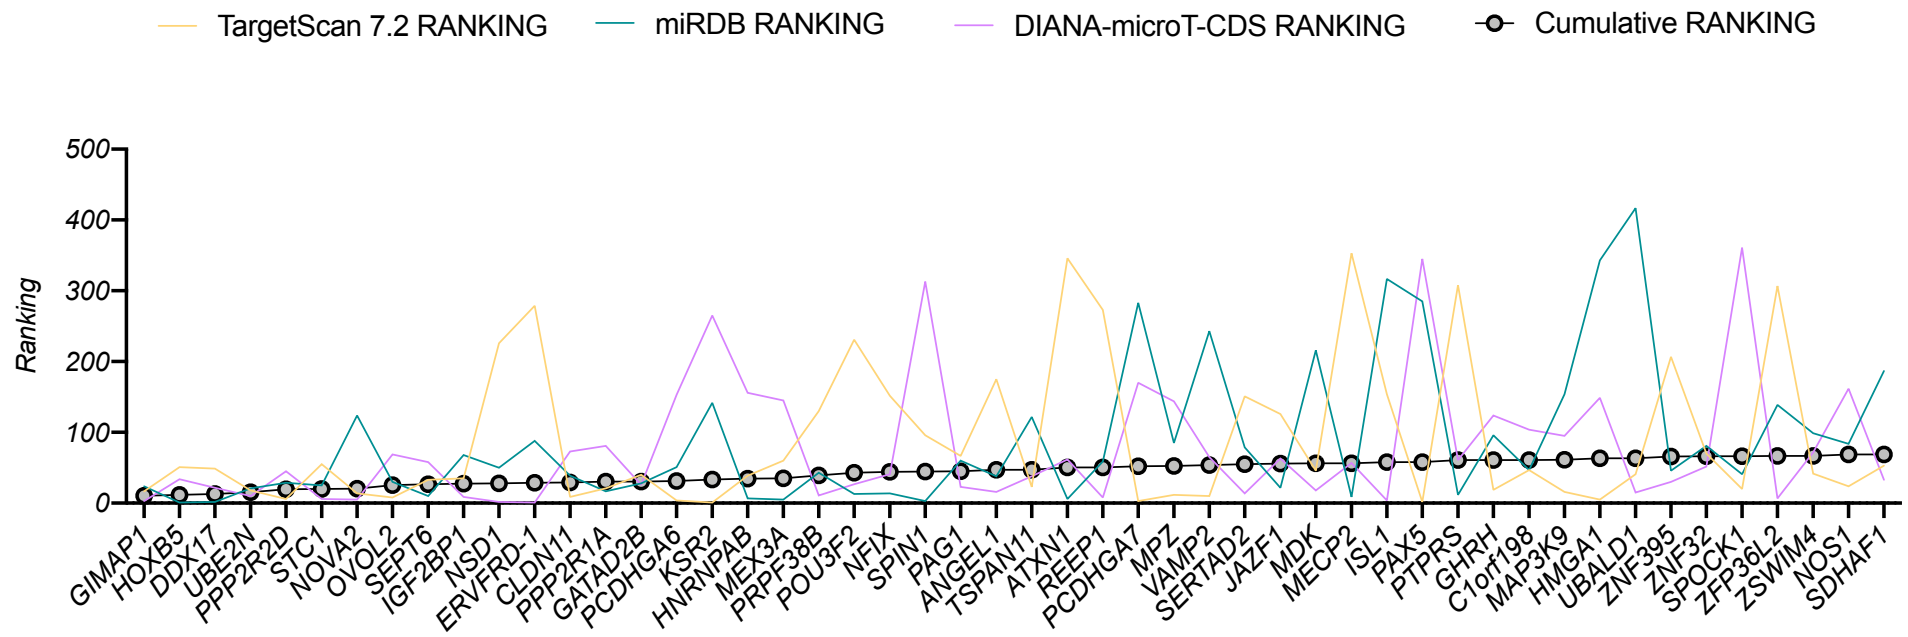

Supplement: s1 [file s1]

**A**

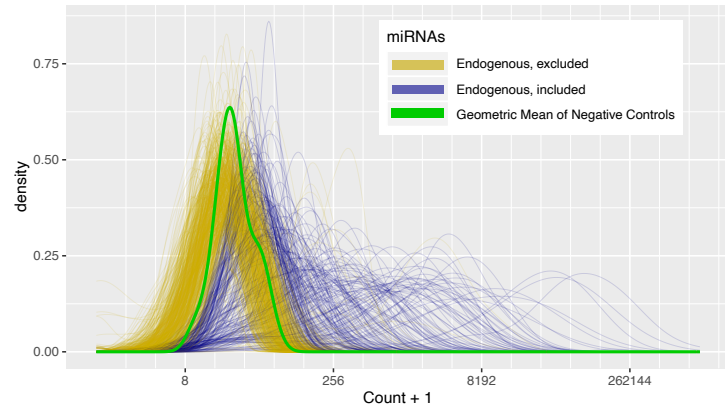

**B**

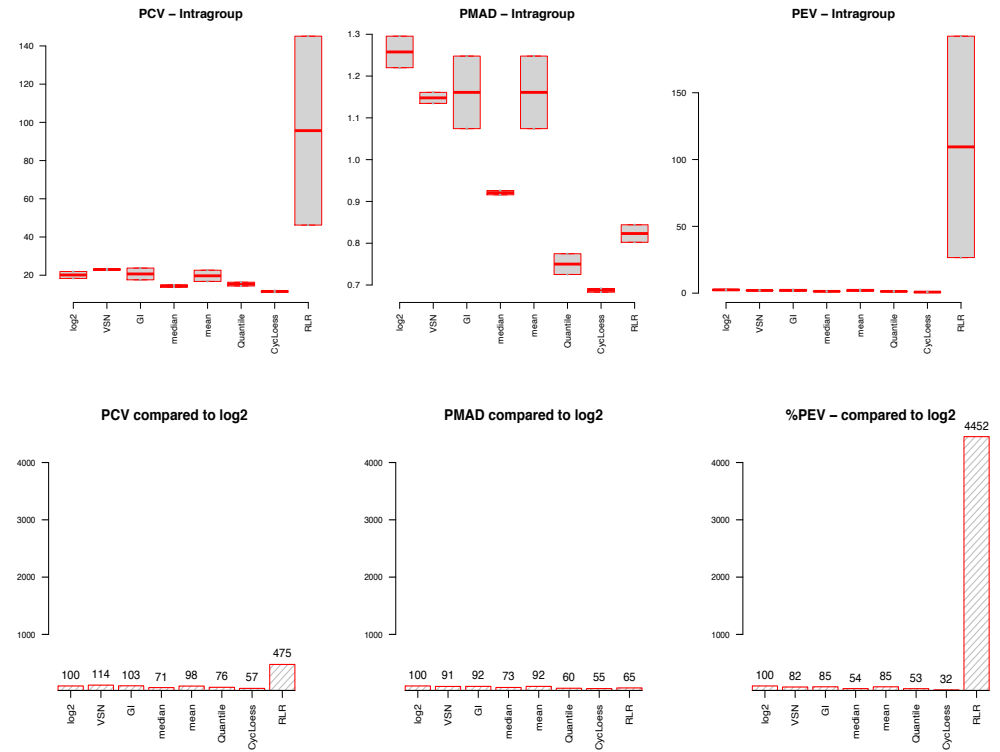

**C**

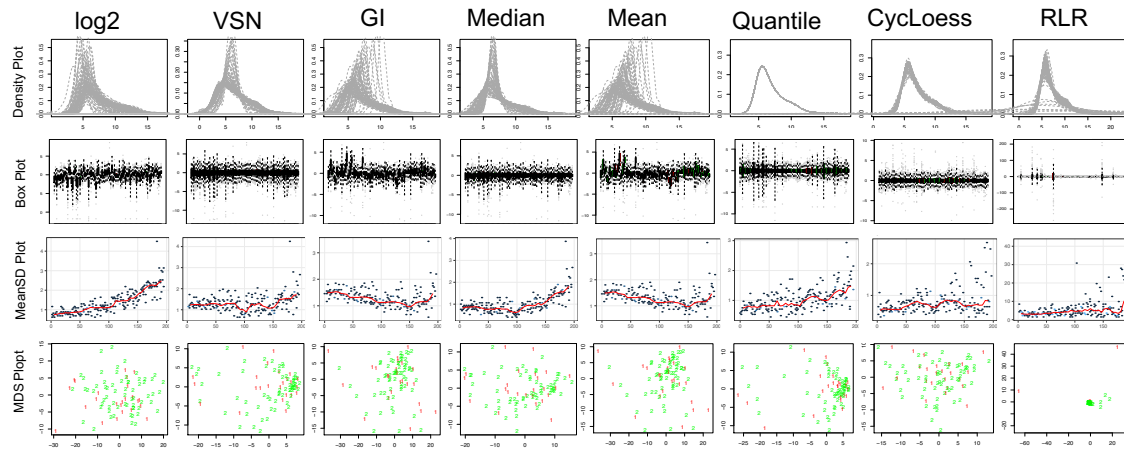

Supplement: s1 [file s1]

2DLL

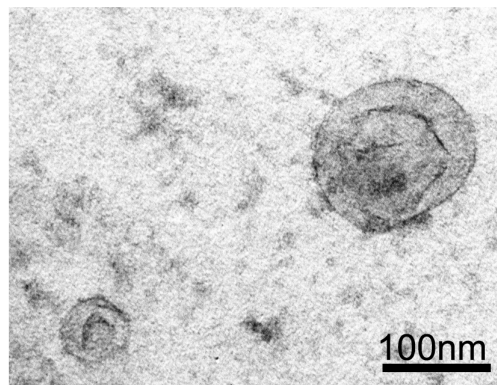

19DGM

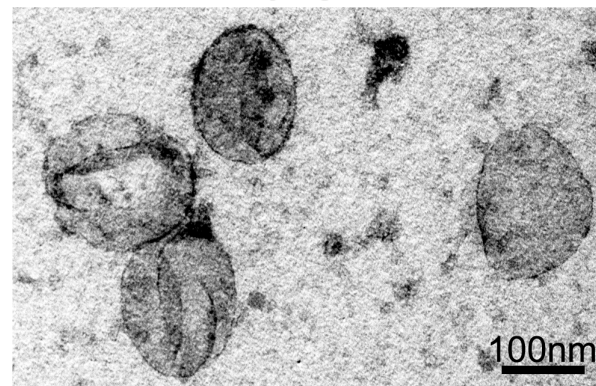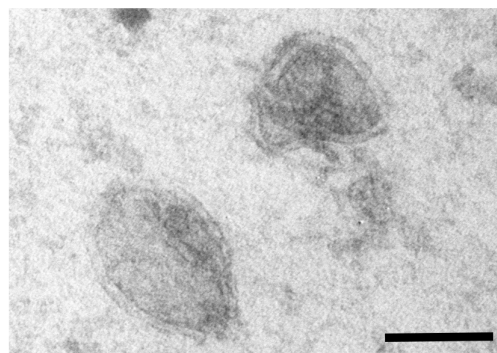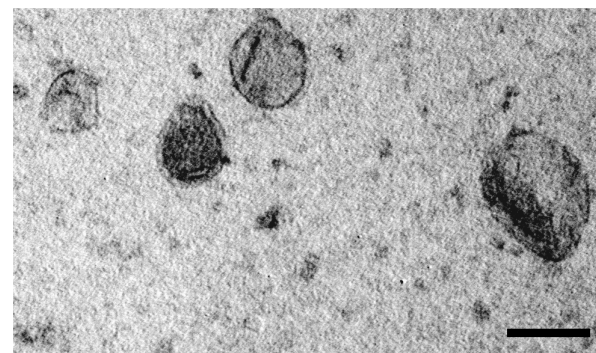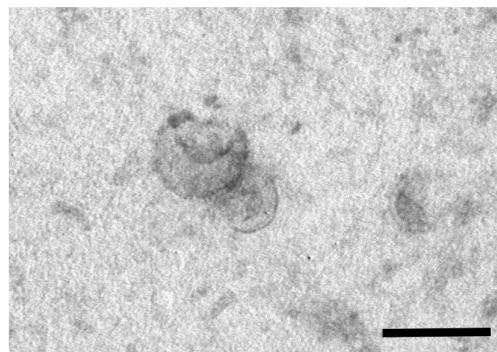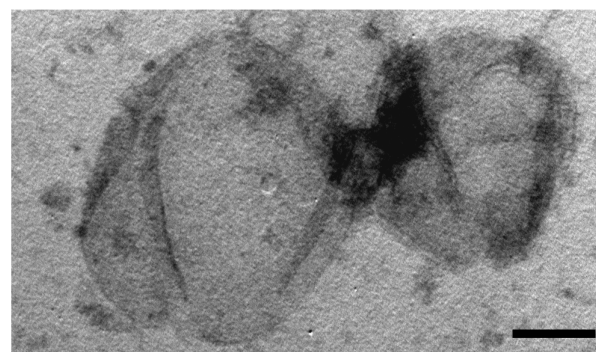

Supplement: s1 [file s1]

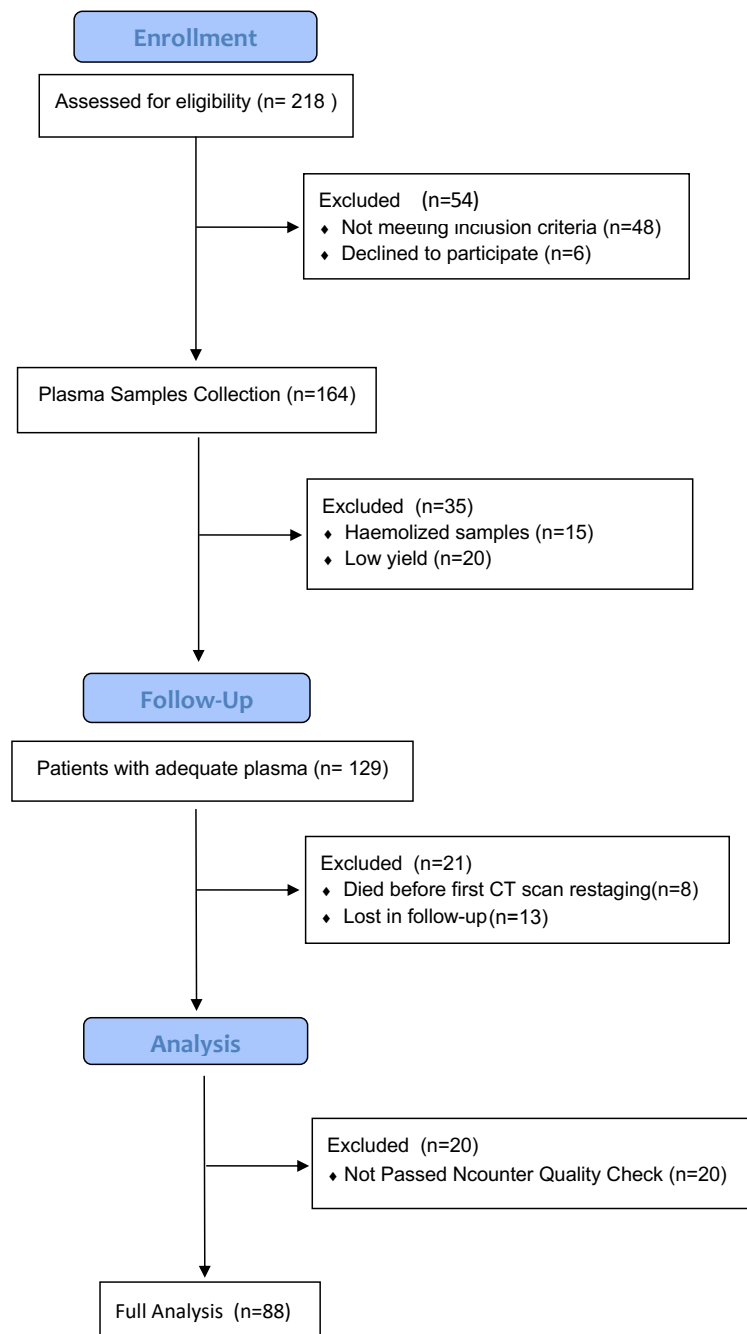

Supplement: s1 [file s1]
